# Supplementary material for: Aqueous singlet oxygen reaction kinetics of furfuryl alcohol: effect of temperature, pH, and salt content
Source: Royal Society of Chemistry journal article supplement (doi:10.1039/c6em00646a), 2017-01-01
Supplement: c6em00646a1.pdf [file c6em00646a1.pdf]

## Supporting information

### Aqueous singlet oxygen reaction kinetics of furfuryl alcohol: Effect of temperature, pH, and salt content.

Elena Appiani<sup>1,‡</sup>, Rachele Ossola<sup>1,‡</sup>, Douglas E. Latch<sup>2</sup>, Paul R. Erickson<sup>1,\*</sup>, Kristopher McNeill<sup>1,\*</sup>

<sup>1</sup>Institute of Biogeochemistry and Pollutant Dynamics (IBP), Department of Environmental Systems Science, ETH Zurich, 8092 Zurich Switzerland.

<sup>2</sup>Department of Chemistry, Seattle University, Seattle, Washington 98122, United States

‡These authors contributed equally to this work and are listed alphabetically

\*Corresponding authors: [paul.erickson@env.ethz.ch](mailto:paul.erickson@env.ethz.ch), [kris.mcneill@env.ethz.ch](mailto:kris.mcneill@env.ethz.ch)

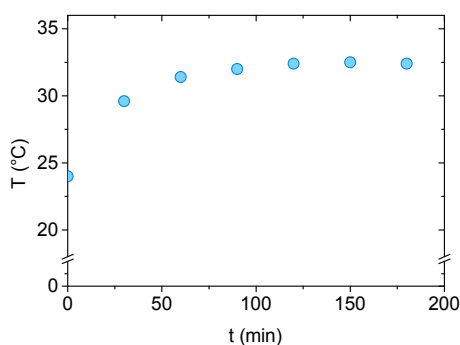

**Figure S1** Temperature profile during a 3-hour photolysis experiment performed with  $10 \times 365$  nm bulbs in a Rayonet reactor and a polymer heat filter cylinder between the bulbs and the sample tubes.

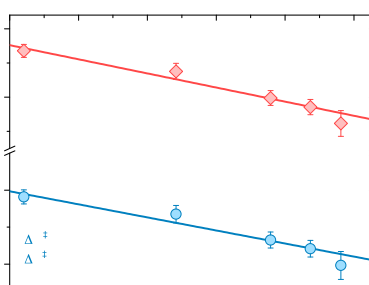

**Figure S2** Arrhenius (orange) and Eyring (blue) plots obtained from steady-state experiments performed in the temperature range 6 – 47°C. The errors in  $k_{rxn,FFA}$  are calculated assuming the error in  $k_d^\Delta$  (eq.(4)) is equal to zero.

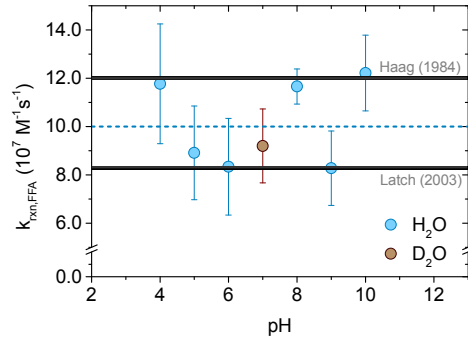

**Figure S3** pH dependence on  $k_{rxn,FFA}$  studied with the steady-state ( $\beta$  value) method determined at 26°C. The blue dotted line represents the average value measured in water (blue circles) of  $(1.0 \pm 0.6) \times 10^8 M^{-1} s^{-1}$ . The errors in  $k_{rxn,FFA}$  are calculated assuming the error in  $k_d^\Delta$  (eq.(4)) is equal to zero.

### $k_d^\Delta$ values measured in time-resolved experiments

As a double check, we report the measured  $k_d^\Delta$  (singlet oxygen deactivation rate constant in water without added quenchers, the intercept of the Stern-Volmer plots) in the pH- and T-variation experiments.

$k_d^\Delta$  literature values in water range from  $2.4 \times 10^5 s^{-1}$  to  $3.2 \times 10^5 s^{-1}$ <sup>1,2</sup>, and are known to have a weak T-dependence<sup>3</sup>. In the pH-variation experiments we measured a constant value of  $(2.76 \pm 0.02) \times 10^5 s^{-1}$ , in agreement with the available literature. Instead, in the T-variation experiments we observed  $k_d^\Delta$  in the interval  $2.69 - 3.00 \times 10^5 s^{-1}$ , with the lowest values observed at 10°C and the highest at 45°C.

| $T$ (°C) | pH    | $k_d^\Delta$ ( $10^5 s^{-1}$ ) |
|----------|-------|--------------------------------|
| 19-20    | 3.07  | $2.78 \pm 0.02$                |
| 19-20    | 3.91  | $2.76 \pm 0.02$                |
| 19-20    | 5.11  | $2.79 \pm 0.03$                |
| 19-20    | 5.99  | $2.75 \pm 0.02$                |
| 19-20    | 6.97  | $2.76 \pm 0.03$                |
| 19-20    | 7.99  | $2.77 \pm 0.02$                |
| 19-20    | 9.1   | $2.76 \pm 0.02$                |
| 19-20    | 10.14 | $2.75 \pm 0.04$                |
| 19-20    | 10.93 | $2.78 \pm 0.02$                |
| 19-20    | 11.96 | $2.74 \pm 0.03$                |
| 5.1      | 6.8   | $2.71 \pm 0.03$                |
| 10       | 6.8   | $2.69 \pm 0.03$                |
| 25.1     | 6.8   | $2.78 \pm 0.03$                |
| 25.1     | 6.8   | $2.77 \pm 0.05$                |
| 30.1     | 6.8   | $2.90 \pm 0.05$                |
| 30.2     | 6.8   | $2.89 \pm 0.04$                |
| 35.1     | 6.8   | $2.85 \pm 0.03$                |
| 35.5     | 6.8   | $2.92 \pm 0.05$                |
| 40.2     | 6.8   | $2.96 \pm 0.06$                |
| 40.0     | 6.8   | $2.88 \pm 0.08$                |
| 45.1     | 6.8   | $2.88 \pm 0.07$                |
| 45.2     | 6.8   | $3.00 \pm 0.04$                |

### Calculation of correction factors for old literature data

Singlet oxygen steady-state concentrations reported in previous studies that used  $1.2 \times 10^8 M^{-1} s^{-1}$  for  $k_{rxn,FFA}$  are most likely underestimated by 10 – 20%, the actual value being dependent on the solution temperature and ionic strength, as well as the assumptions in the calculation of  $[^1O_2]_{ss}$ .

For instance, if FFA quenching is *not* taken into account (a reasonable approximation when  $[FFA] < 110 \mu M$ ),  $[^1O_2]_{ss}$  is determined as

$$[^1O_2]_{ss} = \frac{k_{obs,FFA}}{k_{rxn,FFA}} \quad (S1)$$

where  $k_{obs,FFA} [s^{-1}]$  is the observed degradation rate constant for FFA. Thus, for a given  $k_{obs,FFA}$  the following equation holds.

$$\frac{[^1O_2]_{ss}^{new}}{[^1O_2]_{ss}^{old}} = \frac{k_{rxn,FFA}^{old}}{k_{rxn,FFA}^{new}} \quad (S2)$$

where  $[^1O_2]_{ss}^{old}$  is the singlet oxygen steady-state concentration calculated with  $k_{rxn,FFA}^{old} = 1.2 \times 10^8 M^{-1} s^{-1}$  (Haag), and  $[^1O_2]_{ss}^{new}$  is obtained with  $k_{rxn,FFA}^{new}$ , whose value depends on solution temperature and ionic strength (see eq.s (13) – (15) in the manuscript). The ratio  $[^1O_2]_{ss}^{new}/[^1O_2]_{ss}^{old} = CF$  is the factor that can be used to convert old singlet oxygen concentration in new corrected values.

$$[^1O_2]_{ss}^{new} = CF \cdot [^1O_2]_{ss}^{old} \quad (S3)$$

Figure S4 reports  $CF$  values calculated in the temperature interval 20 – 40 °C for freshwaters (blue line) and seawaters (red line) using the equations of the main manuscript.

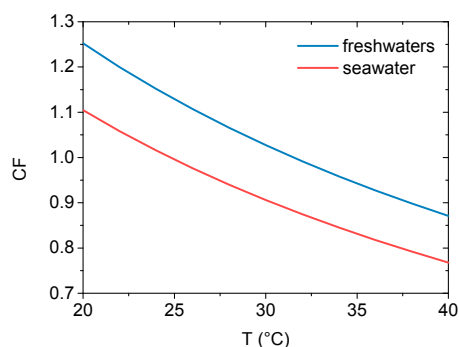

**Figure S4** Correction factors ( $CF$ ) in the temperature interval 20 – 40°C for singlet oxygen concentrations in freshwater (blue line) and seawater (red line). A reference line (grey, dotted) is drawn at  $CF = 1.0$ .

## References

- (1) Baier, J.; Fuß, T.; Pöllmann, C.; Wiesmann, C.; Pindl, K.; Engl, R.; Baumer, D.; Maier, M.; Landthaler, M.; Bäuml, W. *J. Photochem. Photobiol. B* **2007**, *87* (3), 163–173.
- (2) Wilkinson, F.; Helman, W. P.; Ross, A. B. *J. Phys. Chem. Ref. Data* **1995**, *24* (2), 663–677.
- (3) Bregnhøj, M.; Westberg, M.; Jensen, F.; Ogilby, P. R. *Phys. Chem. Chem. Phys.* **2016**, *18* (33), 22946–22961.
- (4) Rosario-Ortiz, F. L.; Canonica, S. *Environ. Sci. Technol.* **2016**, *50* (23), 12532–12547.
